# Supplementary material
Source: PubMed Central journal article supplement (PMC6296827)
Supplement: NIHMS1511884-supplement-1.pdf [file NIHMS1511884-supplement-1.pdf]

**Cell Host & Microbe, Volume XX**

**Supplemental Information**

**O-GlcNAc transferase links glucose**

**metabolism to MAVS-mediated**

**antiviral innate immunity**

**Tianliang Li, Xinghui Li, Kuldeep S. Attri, Changhong Liu, Lupeng Li, Laura E. Herring,  
John M. Asara, Yu Lei, Pankaj K. Singh, Chengjiang Gao, and Haitao Wen**

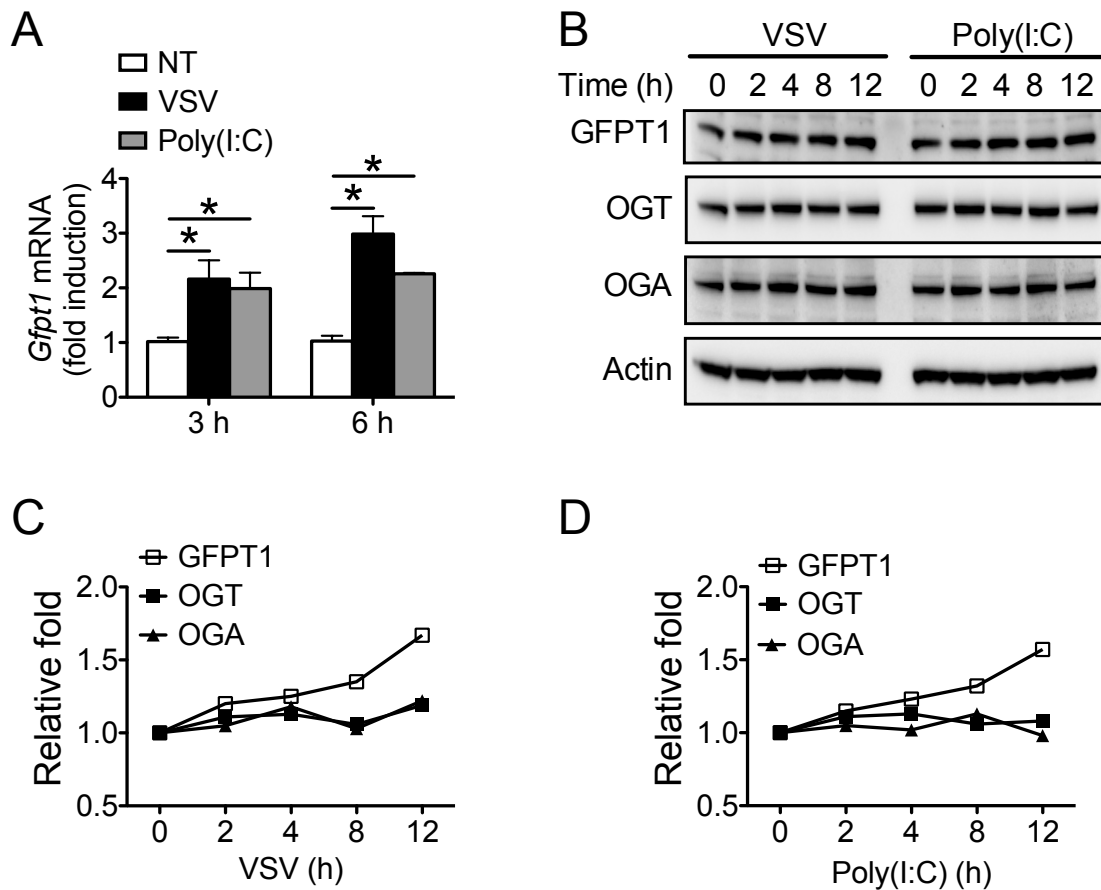

**Figure S1. Related to Figure 1.** Effect of RLR activation on expression levels of key HBP enzymes. (A-D) BMMs generated from C57BL/6 mice were left untreated, or stimulated with either vesicular stomatitis virus (VSV) (multiplicity of infection (MOI) = 1) or transfected poly(I:C) for indicated periods. Transcript level of glutamine fructose-6-phosphate transaminase (GFPT1) was assayed by RT-PCR (A). Immunoblotting (B) and densitometric analysis (C and D) to quantify ratio of protein level of GFPT1, OGT and OGA to actin in treated BMMs. \*  $P < 0.05$ , versus controls (two-tailed Student's  $t$ -test (A)). Data are presented as mean values of biological triplicates  $\pm$  s.d.

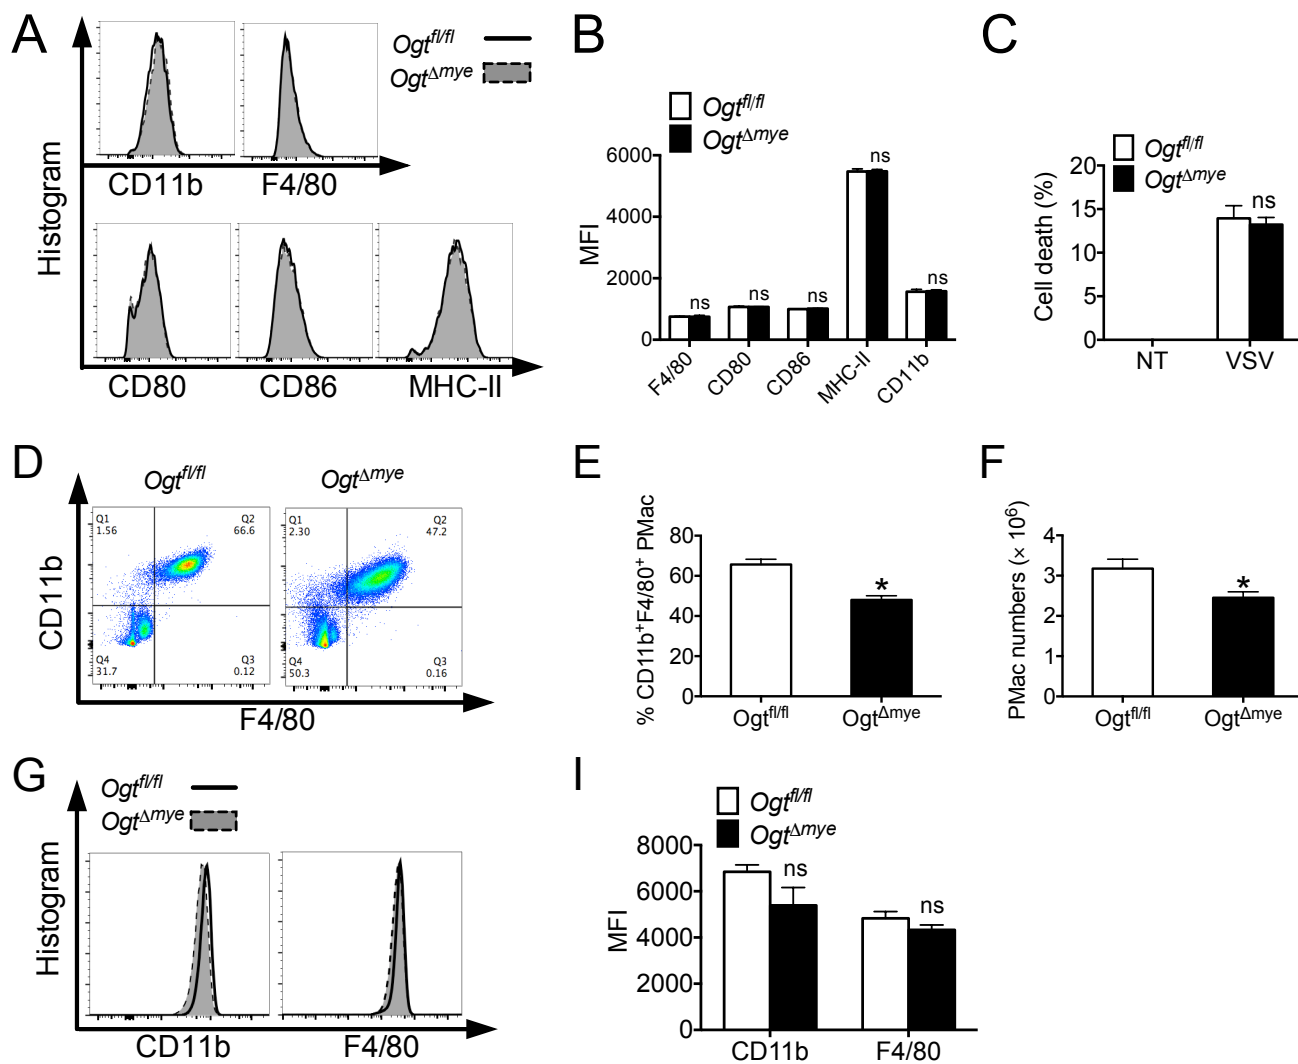

**Figure S2. Related to Figure 2. OGT deletion causes a moderate defect in differentiation of peritoneal macrophages (PMac), whereas does not affect BMM differentiation or cell viability after VSV stimulation.** (A-B) Macrophage differentiation markers CD11b and F4/80, and activation markers CD80, CD86 and MHCII were measured by flow cytometry assay in BMMs generated from *Ogt<sup>fl/fl</sup>* and *Ogt<sup>Δmye</sup>* mice. Histogram (A) and quantification of the mean fluorescence intensity (MFI) (B) were shown. (C) Cell viability was measured with the Cytotoxicity Detection Kit (LDH) in *Ogt<sup>fl/fl</sup>* and *Ogt<sup>Δmye</sup>* BMMs in the absence or presence of VSV stimulation (MOI = 1) for 6 h. (D-F) Peritoneal

macrophages (CD11b<sup>+</sup>F4/80<sup>+</sup>) in *Ogt*<sup>f/f</sup> and *Ogt*<sup>Δmye</sup> mice were measured by FACS analysis (D). The percent (E) and total number (F) of PMac were shown. (G-H) Histogram (G) and quantification of the MFI (H) of macrophage differentiation markers CD11b and F4/80 were measured by FACS assay in PMac isolated from *Ogt*<sup>f/f</sup> and *Ogt*<sup>Δmye</sup> mice. ns, not significant, versus controls (two-tailed Student's *t*-test (B and C)). Data are presented as mean values of biological triplicates ± s.d.

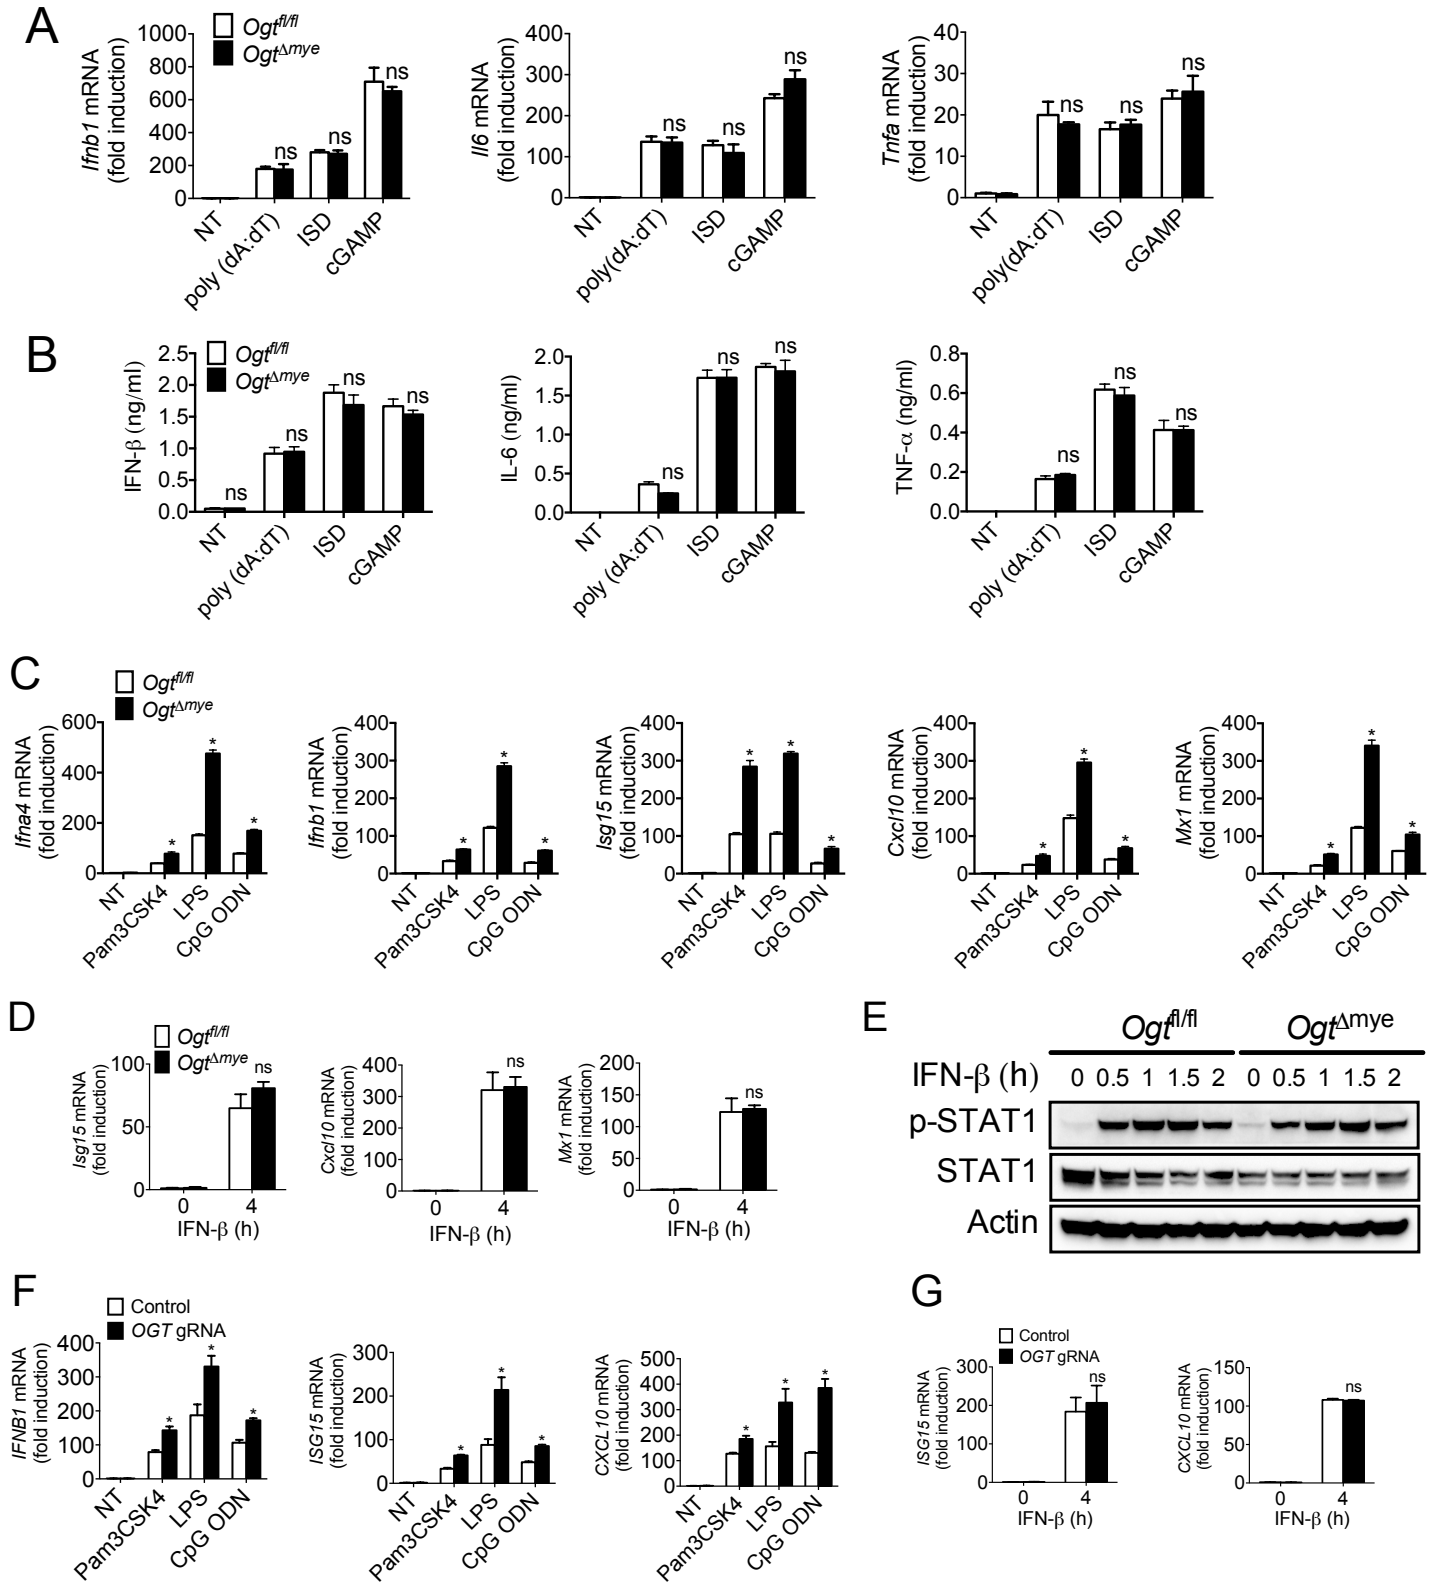

**Figure S3. Related to Figure 3. No defect in activation of immune signaling other than RLR pathway in OGT-KO cells.** (A to E) BMMs generated from *Ogt<sup>f/f</sup>* and *Ogt<sup>Δmye</sup>* mice were left untreated or transfected with poly(dA:dT), interferon stimulatory DNA (ISD), or cGAMP (all at 2 μg/ml) by lipofectamine 2000 for 6 h (A) or 16 h (B), various TLR agonists including Pam3Cys (500 ng/ml), LPS (100 ng/ml) or CpG oligonucleotide (ODN) 1826 (5 μg/ml) (C), or recombinant mouse IFN-β (20 ng/ml) (D and E). Cytokine gene transcripts in the cells (A, C and D) and cytokine proteins in the supernatants (B) were measured with RT-PCR and ELISA, respectively. (F and G) IFN-I gene transcripts in *OGT*-KO and WT control THP-1 cells left untreated or stimulated with LPS (F) or recombinant human IFN-β. \*  $P < 0.05$ , ns, not significant, versus controls (two-tailed Student's *t*-test (A, B, C, D, F and G)). Data are presented as mean values of biological triplicates ± s.d.

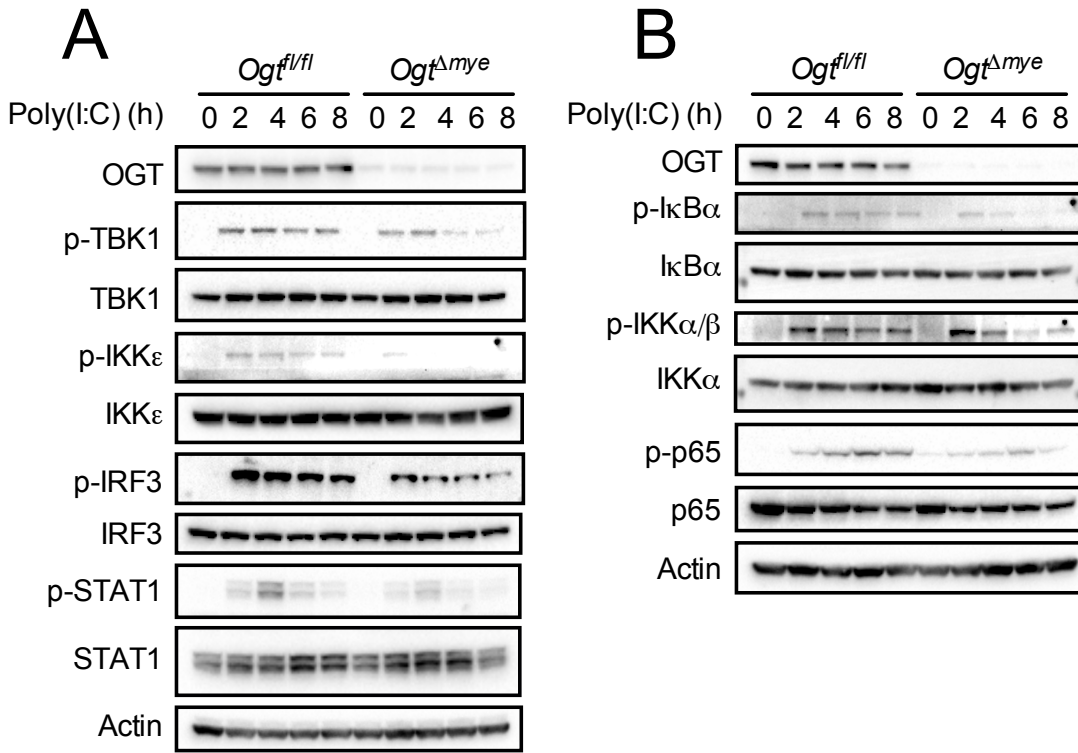

**Figure S4. Related to Figure 3. OGT is critical for the activation of antiviral immune signaling.**

(A and B) BMMs generated from *Ogt<sup>fl/fl</sup>* and *Ogt<sup>Δmye</sup>* mice were left untreated or transfected with 4 μg/ml poly(I:C) by lipofectamine 2000 for indicated periods. Phosphorylation of IFN-I signaling molecules including TBK1, IKKε, IRF3 and STAT1 (A) and NF-κB signaling molecules including IκBα, IKKα/β and p65 (B) was assessed by immunoblotting. Data are from one experiment representative of three experiments.

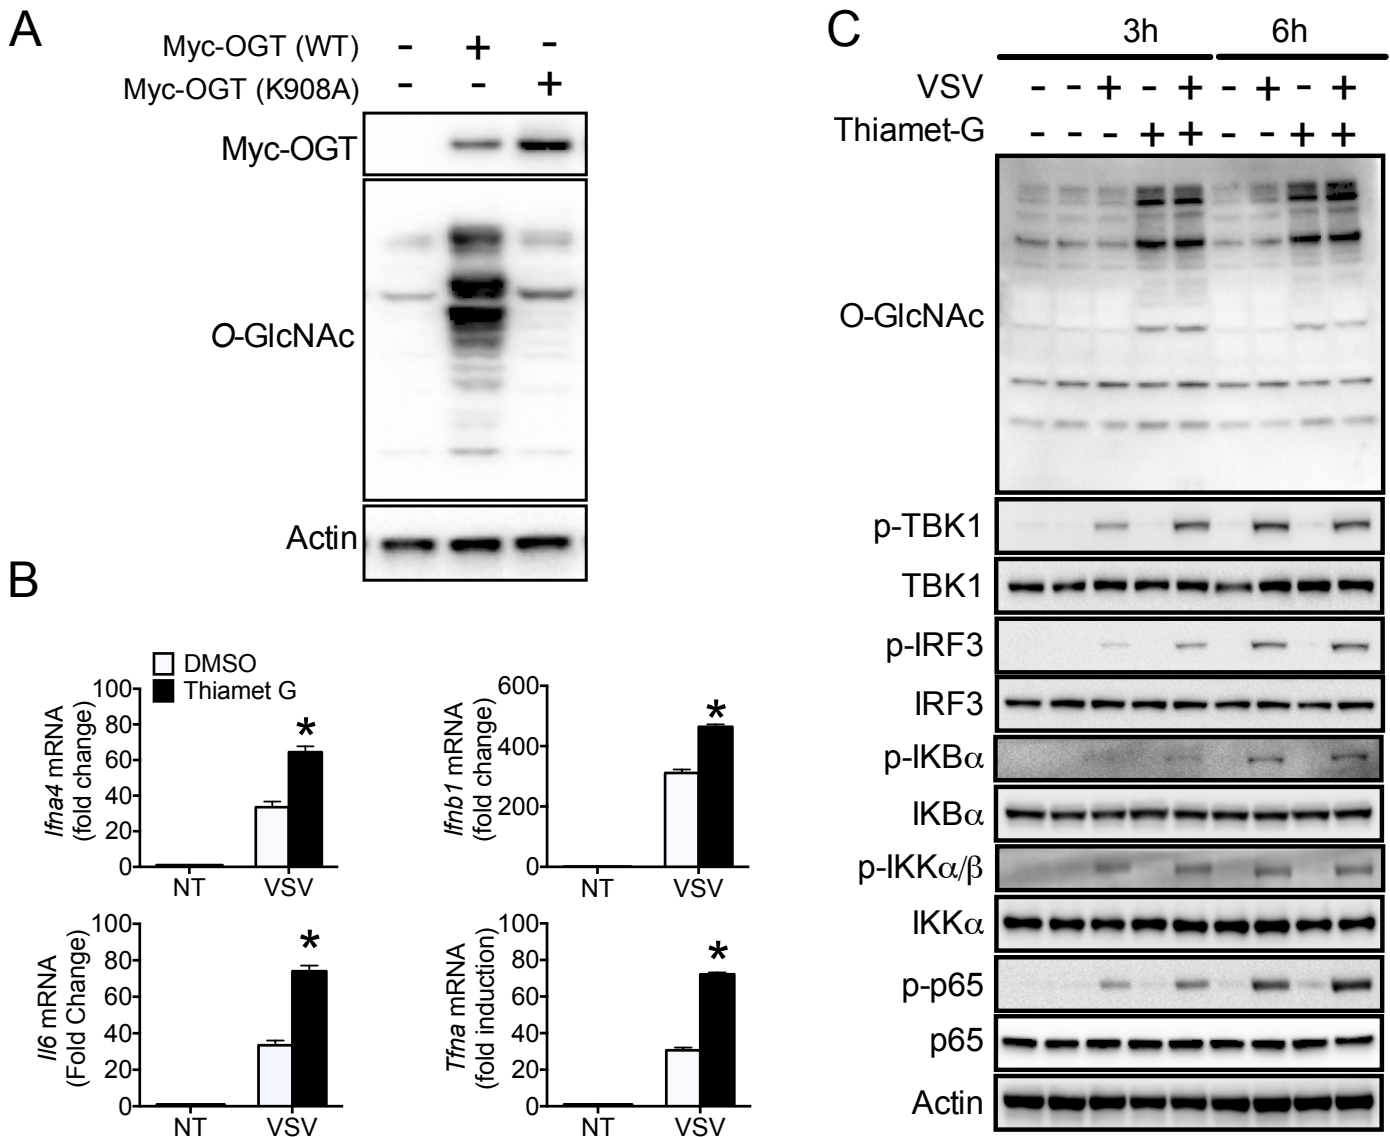

**Figure S5. Related to Figure 5. K908A mutation causes defective enzymatic activity of OGT, and pharmacological activation of the O-GlcNAc signaling promotes antiviral immune activation.** (A) 293T cells were transfected for 30 h with either Myc-tagged OGT WT (middle lane) or K908A mutant (right lane). Protein O-GlcNAcylation in total cell lysate was assessed with specific anti-O-GlcNAc antibody by immunoblotting. Data are from one experiment representative of six experiments. (B-C) BMMs generated from *Ogt<sup>fl/fl</sup>* and *Ogt<sup>Δmye</sup>* mice were pretreated with or without thiamet G (10  $\mu$ M) for 2 h, followed by the challenge with VSV. Transcripts of *Ifna4*, *Ifnb1*, *Il6* and



*Tnfa* were measured with RT-PCR (A). Immunoblotting of total and phosphorylated TBK1, IRF3, I $\kappa$ B $\alpha$ , IKK $\alpha$ / $\beta$  and p65 was performed (C). \*  $P < 0.05$ , versus controls (two-tailed Student's  $t$ -test (B)). Data are presented as mean values of biological triplicates  $\pm$  s.d.

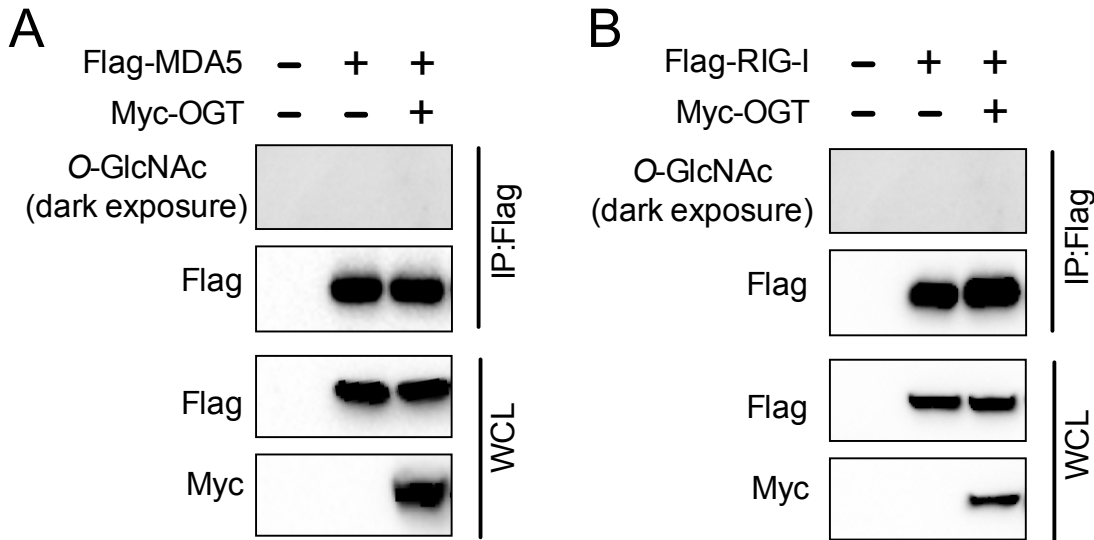

**Figure S6. Related to Figure 6. Neither RIG-I nor MDA5 is targeted for O-GlcNAcylation.** (A and B) 293T cells were transfected for 30 h with the expression vector for either Flag-tagged MDA5 (A) or Flag-tagged RIG-I (B) in the presence or absence of Myc-tagged OGT. Total MDA5 (A) or RIG-I (B) was immunoprecipitated with anti-Flag agarose beads and then assessed for O-GlcNAcylation with specific anti-O-GlcNAc antibody by immunoblotting. Data are from one experiment representative of two independent experiments.

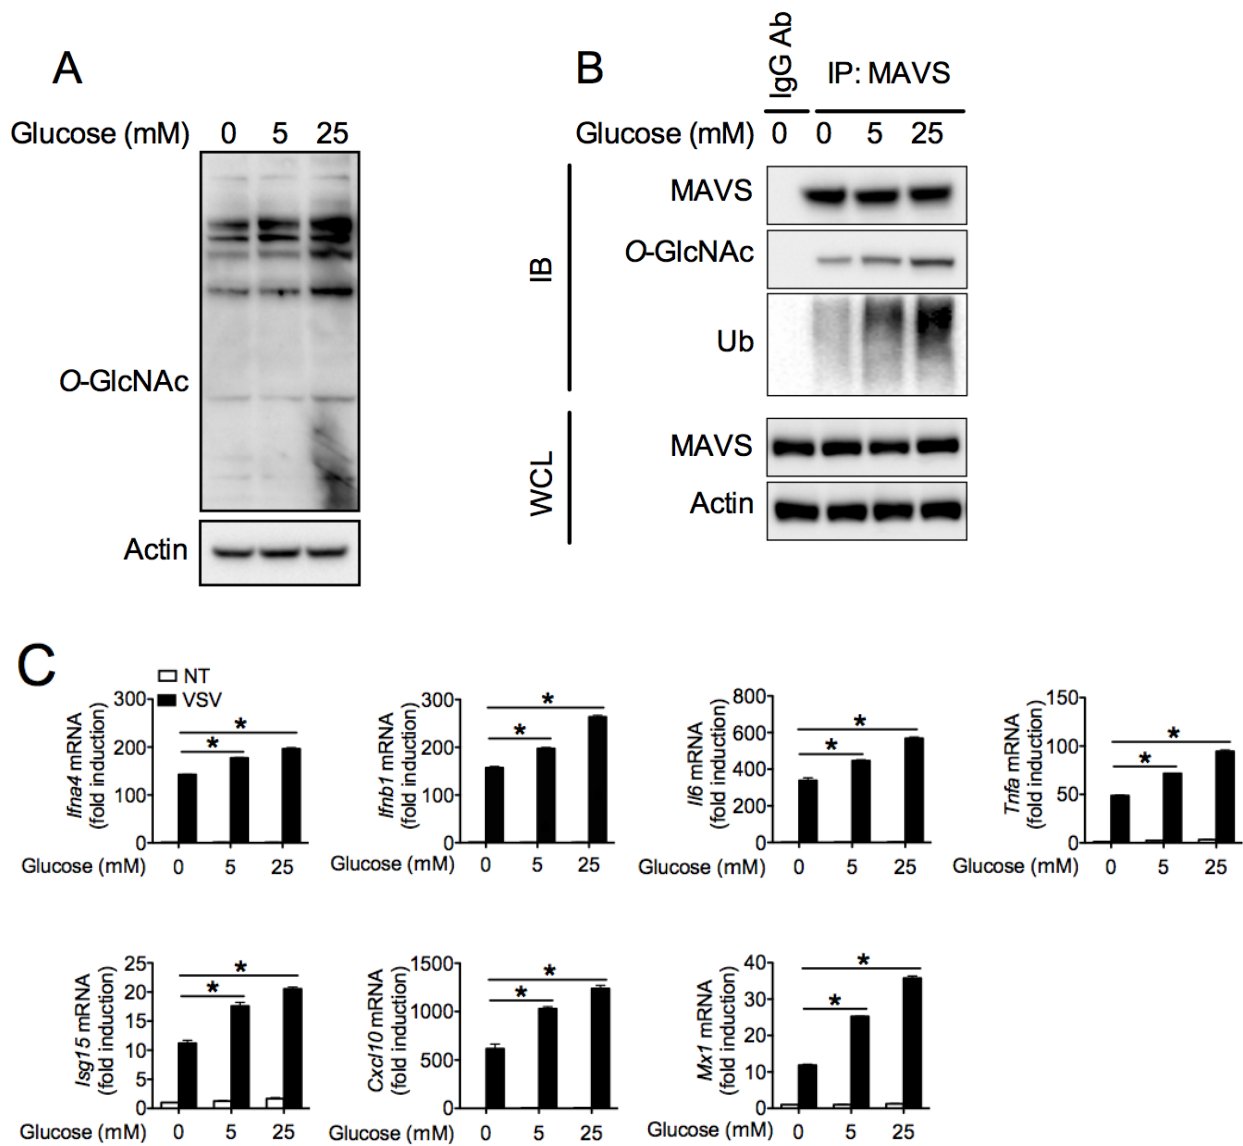

**Figure S7. Related to Figure 7. Glucose availability determines MAVS O-GlcNAcylation and ubiquitination.** (A) Total protein O-GlcNAcylation in BMMs generated from B57BL/6 mice placed in culture medium with 0, 5 or 25 mM glucose for 16 h. (B and C) BMMs generated from B57BL/6 mice were placed in culture medium with 0, 5 or 25 mM glucose for 16 h, followed by VSV stimulation for 4 h. Endogenous MAVS was immunoprecipitated, followed by immunoblotting with either anti-ubiquitination or anti-O-GlcNAcylation antibodies (B). Gene transcripts including *Ifna4*, *Ifnb1*, *Il6*, *Tnfa*,

*Isg15*, *Cxcl10* and *Mx1* in the cells were measured with RT-PCR (C). \*  $P < 0.05$ , versus controls (two-tailed Student's *t*-test (C)). Data are presented as mean values of biological triplicates  $\pm$  s.d.

**Table S2. Primer sequences for RT-PCR. Related to Figure 2, 3 and 4.**

| Genes               | Forward                  | Reverse                   |
|---------------------|--------------------------|---------------------------|
| Mouse <i>Ifna4</i>  | CCTGTGTGATGCAGGAACC      | TCACCTCCCAGGCACAGA        |
| Mouse <i>Ifnb1</i>  | ATGAGTGGTGGTTGCAGGC      | TGACCTTTCAAATGCAGTAGATTCA |
| Mouse <i>Il6</i>    | AGCTGGAGTCACAGAAGGAG     | AGGCATAACGCACTAGGTTT      |
| Mouse <i>Tnfa</i>   | GTCAGGTTGCCTCTGTCTCA     | TCAGGGAAGAGTCTGGAAAG      |
| Mouse <i>Isg15</i>  | TGGAAAGGGTAAGACCGTCCT    | GGTGTCCGTGACTAACTCCAT     |
| Mouse <i>Cxcl10</i> | CCTGCCACGTGTTGAGAT       | TGATGGTCTTAGATTCCGGATTC   |
| Mouse <i>Mx1</i>    | GGGGAGGAAATAGAGAAAATGAT  | GTTTACAAAGGGCTTGCTTGCT    |
| Mouse <i>Actb</i>   | AGGGCTATGCTCTCCCTCAC     | CTCTCAGCTGTGGTGGTGAA      |
| Human <i>IFNB1</i>  | CATTACCTGAAGGCCAAGGA     | CAATTGTCCAGTCCCAGAGG      |
| Human <i>IL6</i>    | CGGGAACGAAAGAGAAGCTCTA   | GGCGCTTGTGGAGAAGGAG       |
| Human <i>TNFA</i>   | GAGGCCAAGCCCTGGTATG      | CGGGCCGATTGATCTCAGC       |
| Human <i>ISG15</i>  | CTGAGAGGCAGCGAACTCAT     | AGCATCTTCACCGTCAGGTC      |
| Human <i>CXCL10</i> | CTCCAGTCTCAGCACCATGA     | GCTCCCCTCTGGTTTTAAGG      |
| Human <i>GADPH</i>  | ATGACATCAAGAAGGTGGTG     | CATACCAGGAAATGAGCTTG      |
| VSV L-domain        | TGATACAGTACAATTATTTGGGAC | GAGACTTTCTGTTACGGGATCTGG  |

**Table S3. Primer sequences for molecular cloning. Related to Figure 5, 6 and 7.**

|                 |         |                                 |
|-----------------|---------|---------------------------------|
| pWPXLd-OGT      | Forward | GCGTTTAAACATGGCGTCTTCCGTGGGCAAC |
|                 | Reverse | GCGGATCCCGTGCTGACTCAGTGAAGTCAAC |
| pWPXLd-MAVS     | Forward | GCGTTTAAACATGCCGTTTGCTGAAGACAAG |
|                 | Reverse | GCACGCGTAAGTGCAGACGCCGCCGGTACAG |
| MAVS N-terminus | Forward | GCCTCGAGATGCCGTTTGCTGAAGACAAG   |
|                 | Reverse | GCTCTAGACTATTTACCCTCTGCAGCCCCTG |
| MAVS C-terminus | Forward | GCCTCGAGCAGGGTGCAGAGAGTGACCAG   |
|                 | Reverse | GCTCTAGACTAGTGCAGACGCCGCCGGTAC  |

**Table S4. Primer sequences for site-directed mutagenesis. Related to Figure 4, 6 and 7.**

---

|                                                    |         |                                                            |
|----------------------------------------------------|---------|------------------------------------------------------------|
| MAVS (S284/285A)                                   | Forward | CAGGCCGAGCCTATCATCTGCGCCGCTGGGGCAGAGGCACCTGCCAAC           |
|                                                    | Reverse | GTTGGCAGGTGCCTCTGCCCCAGCGGCGCAGATGATAGGCTCGGCCTG           |
| MAVS (T300/301A)                                   | Forward | CTCTGCCCTCCAAAGTGCCTGCCGCCTTGATGCCTGTGAACACAGTG            |
|                                                    | Reverse | CACTGTGTTACAGGCATCAAGGCGGCAGGCACTTTGGAGGGCAGAG             |
| MAVS (T328/S329/S330A)                             | Forward | CAGTGCCCTCCAAGTTGCCAGCTGCCGCAAAGCCCCCTGGTGCAGTGCC          |
|                                                    | Reverse | GGCACTGCACCAGGGGGCTTTGCGGCAGCTGGCAACTTGGAGGGCACTG          |
| MAVS (T342A)                                       | Forward | CAGTGCCTTCTAATGCGCTCGCCAATCCAGCACCATCCAAATTG               |
|                                                    | Reverse | CAATTTGGATGGTGCTGGATTGGCGAGCGCATTAGAAGGCACTG               |
| MAVS (S353/T354A)                                  | Forward | CATCCAAATTGCCCATCAACGCAGCCCGTGCTGGCATGGTGCCATC             |
|                                                    | Reverse | GATGGCACCATGCCAGCACGGGCTGCGTTGATGGGCAATTTGGATG             |
| MAVS (S361A)                                       | Forward | CCCGTGCTGGCATGGTGCCAGCCAAAGTGCCTACTAGCATGG                 |
|                                                    | Reverse | CCATGCTAGTAGGCACTTTGGCTGGCACCATGCCAGCACGGG                 |
| MAVS (T365/S366A)                                  | Forward | CATGGTGCCATCCAAAGTGCCTGCTGCAATGGTGCTCACCAAGGTGTC           |
|                                                    | Reverse | GACACCTTGGTGAGCACCATTCAGCAGGCACTTTGGATGGCACCATG            |
| MAVS (T365A)                                       | Forward | GGTGCCATCCAAAGTGCCTGCTAGCATGGTGCTCACCAAGGTG                |
|                                                    | Reverse | CACCTTGGTGAGCACCATGCTAGCAGGCACTTTGGATGGCAC                 |
| MAVS (S366A)                                       | Forward | GCCATCCAAAGTGCCTACTGCAATGGTGCTCACCAAGGTGTC                 |
|                                                    | Reverse | GACACCTTGGTGAGCACCATTCAGTAGGCACTTTGGATGGC                  |
| MAVS (T370A)                                       | Forward | GTGCCTACTAGCATGGTGCTCGCCAAGGTGTCTGCCAGCACAG                |
|                                                    | Reverse | CTGTGCTGGCAGACACCTTGGCGAGCACCATGCTAGTAGGCAC                |
| OGT (K908A)                                        | Forward | TGCTCCTGCAGAGGAACACG                                       |
|                                                    | Reverse | GTTCTCTGCAGGAGCAACAG                                       |
| OGT with gRNA non-recognizable synonymous mutation | Forward | GCCCTAAGTTTGAGTCCAAACCATGCTGTCTCCATGGCAACCTGGCTTGTGTATAC   |
|                                                    | Reverse | GTATACACAAGCCAGGTTGCCATGGACGACAGCATGGTTTGGACTCAAACCTTAGGGC |

---
